# Supplementary material for: Linker dependent chirality of solvent induced self-assembled structures of porphyrin–α-helical peptide conjugates
Source: Royal Society of Chemistry journal article supplement (doi:10.1039/c6ob01633b), 2016-01-01

## Supporting Information

for

### Linker dependent chirality of solvent induced self-assembled structures of porphyrin- $\alpha$ -helical peptide conjugates

F. Biscaglia, E. Frezza, E. Zurlo, and M. Gobbo

#### Table of Contents:

|                                                                                 |       |
|---------------------------------------------------------------------------------|-------|
| Structures of the repeating units used to assemble conjugates <b>1-10</b> ..... | S2    |
| UV-vis and CD spectra .....                                                     | S3-S4 |
| Analytical HPLC and ESI-MS spectra.....                                         | S5-S8 |

**Table S1** Structures of repeating units used to assemble conjugates **1-10**

| Abbreviation | Formula                                                                             | Abbreviation | Formula                                                                               |
|--------------|-------------------------------------------------------------------------------------|--------------|---------------------------------------------------------------------------------------|
| A            | 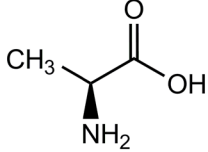   | L            |    |
| a            |    | N            |    |
| F            |    | P            |    |
| G            |   | Q            |   |
| H            |  | R            |   |
| I            |  | S            |  |
| K            |  | T            |  |
| TPP          |  | U            |  |
|              |                                                                                     | Ahx          |   |

## UV-vis and CD spectra of the purified peptides and porphyrin-peptide conjugates

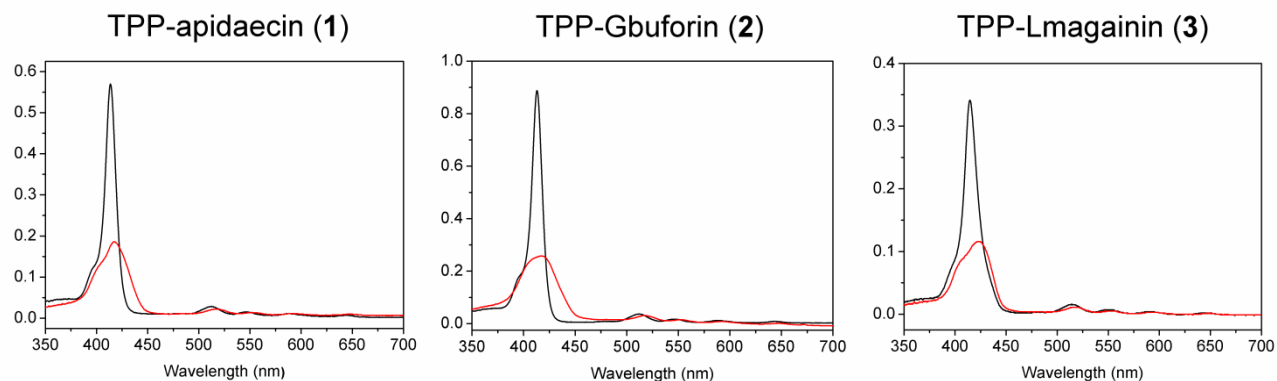

**Fig. S1** – UV-vis spectra of conjugates **1-3** in methanol ( — ) and in water- methanol (90:10 v/v) ( — ).

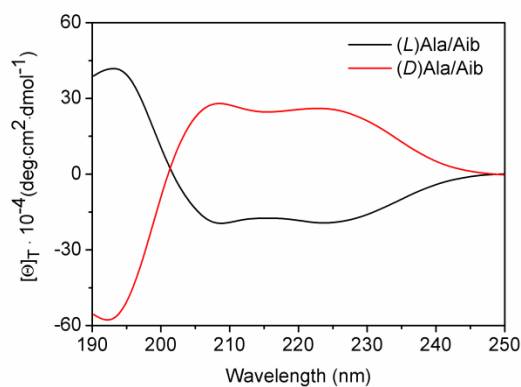

**Fig. S2** – CD spectra in methanol of  $\text{Ac-(LAla-Aib)}_7\text{-LAla-NH}_2$  ( — ) and  $\text{Ac-(DAla-Aib)}_7\text{-DAla-NH}_2$  ( — ). Peptide concentration 100  $\mu\text{M}$ .

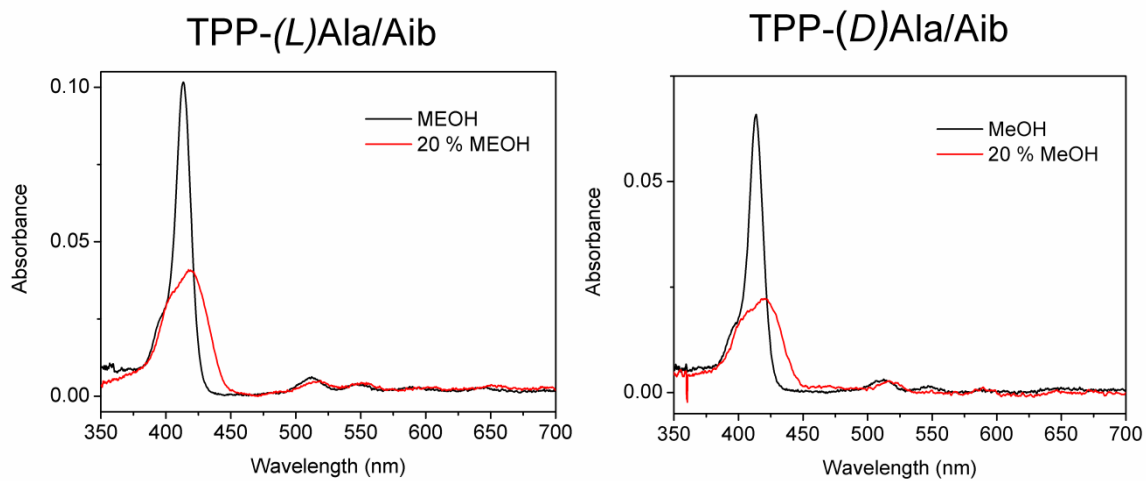

**Fig. S3** – UV-vis spectra of conjugates **4** (left) and **5** (right) in methanol (—) and in water- methanol (80:20 v/v) (—).

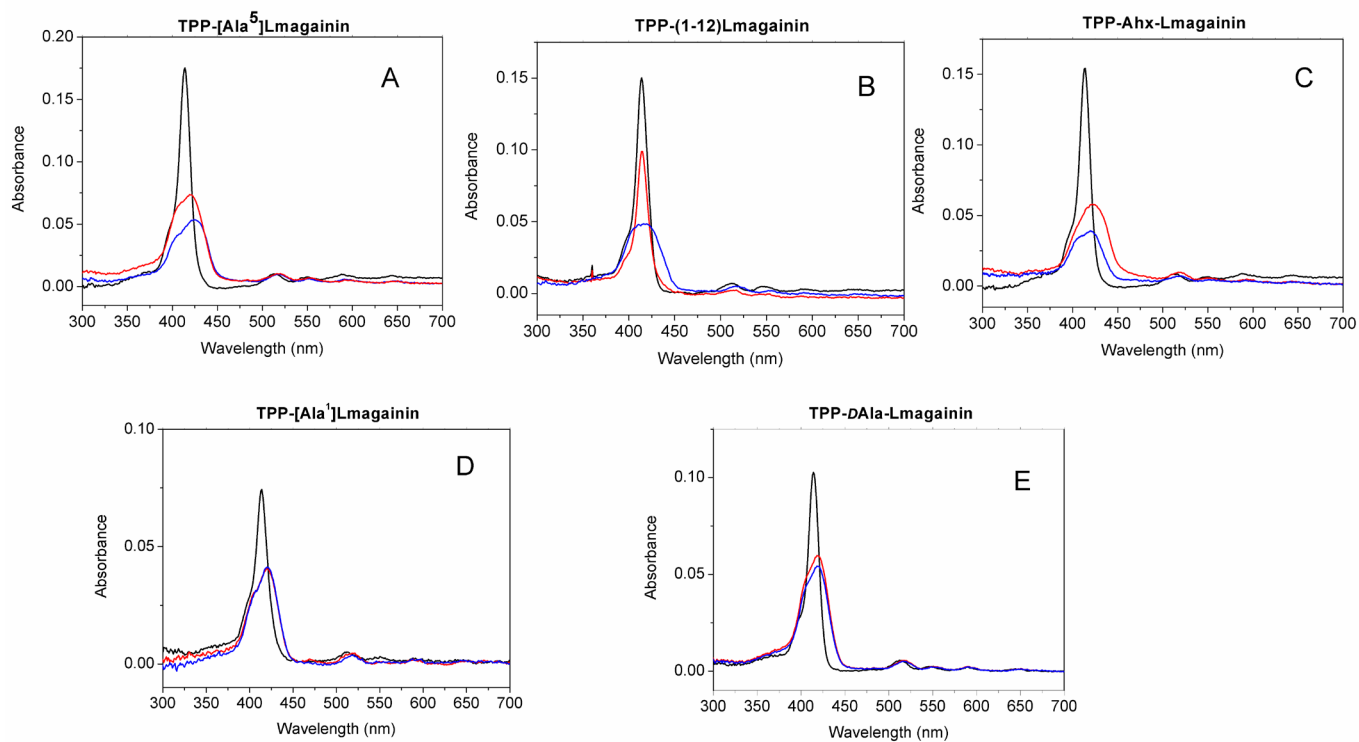

**Fig. S4** - UV-vis spectra of the conjugates **6** (A), **7** (B), **8** (C), **9** (D), **10** (E) in methanol (—) and in water-methanol mixtures: 50:50 (v/v) (—), 80:20 (v/v) (—).

# Analytical HPLC and ESI-MS spectra of the purified porphyrin-peptide conjugates

## (4) TPP-(LAla-Aib)<sub>7</sub>-LAla-NH<sub>2</sub>

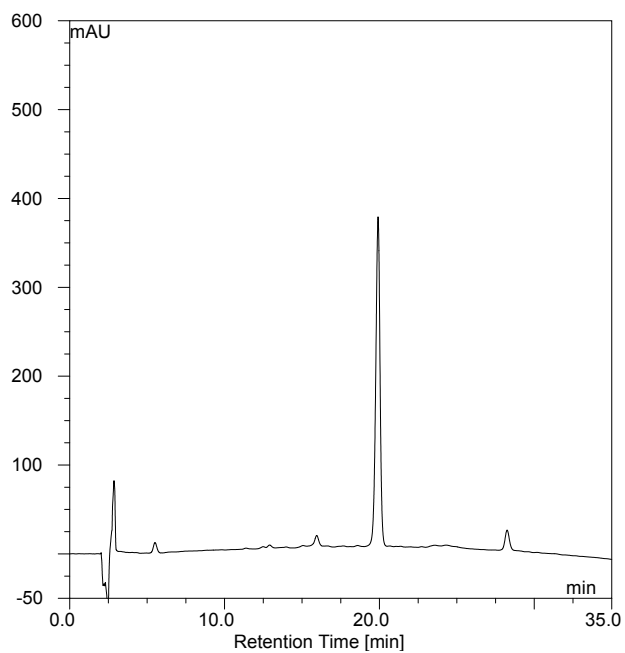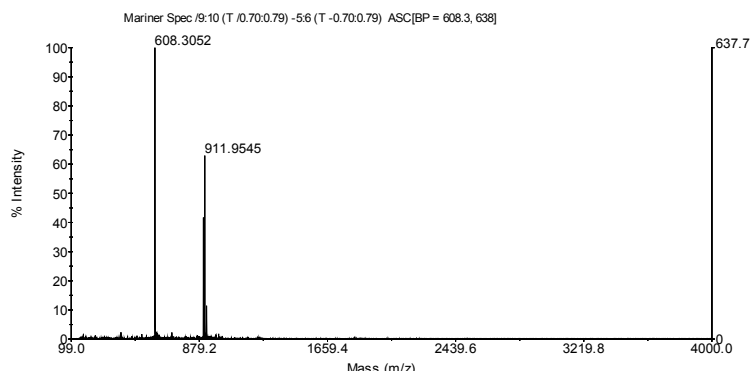

## (5) TPP-(DAla-Aib)<sub>7</sub>-DAla-NH<sub>2</sub>

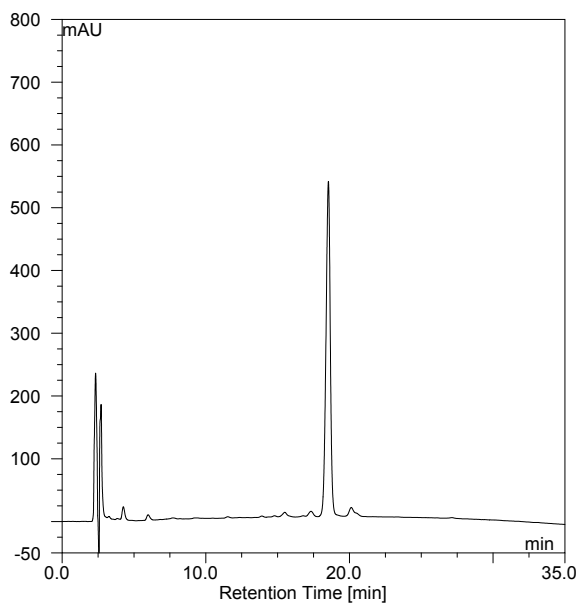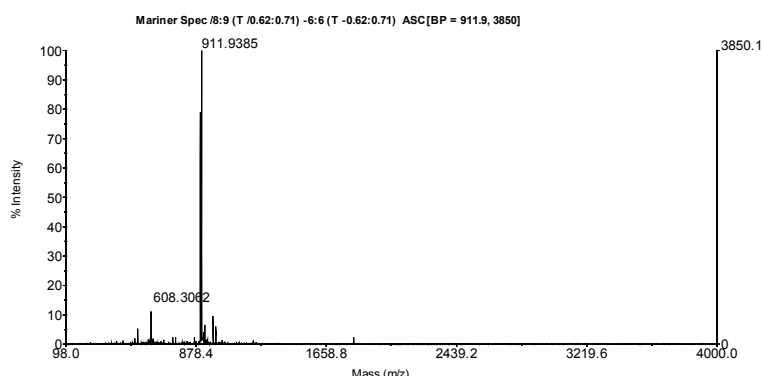

### (6) TPP-[Ala<sup>5</sup>]Lmagainin

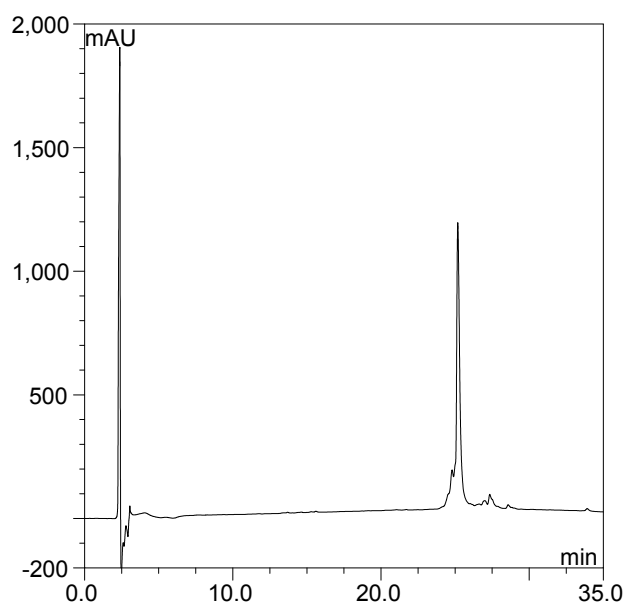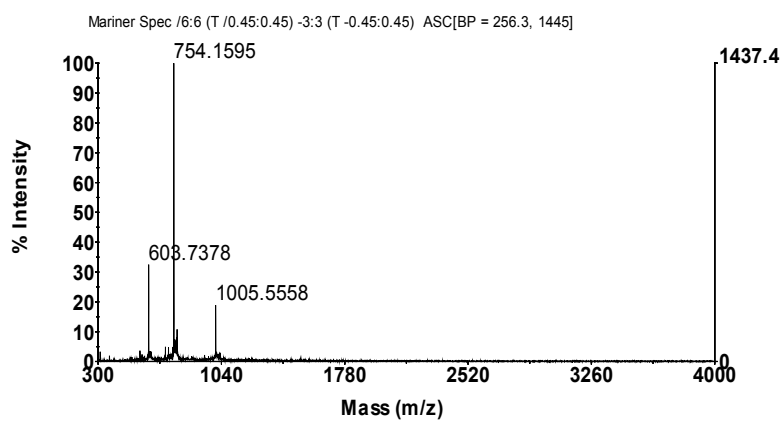

### (7) TPP-[1-12]Lmagainin

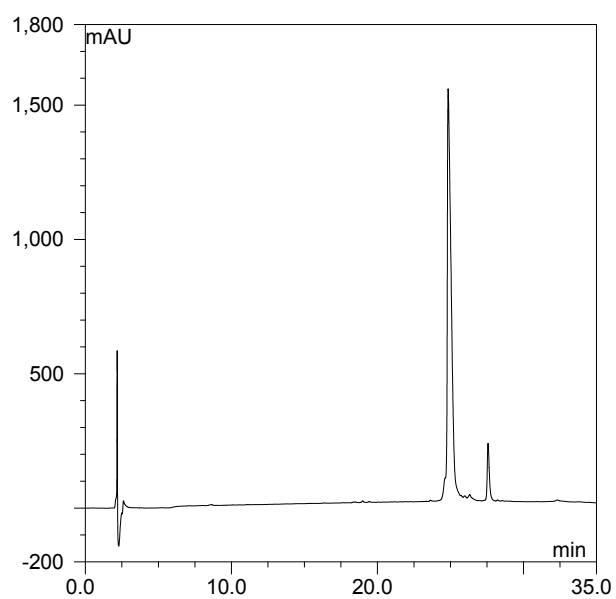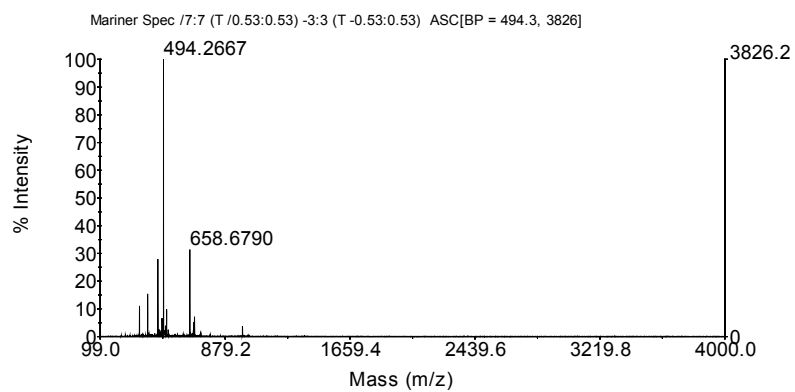

**(8) TPP-Ahx-Lmagainin**

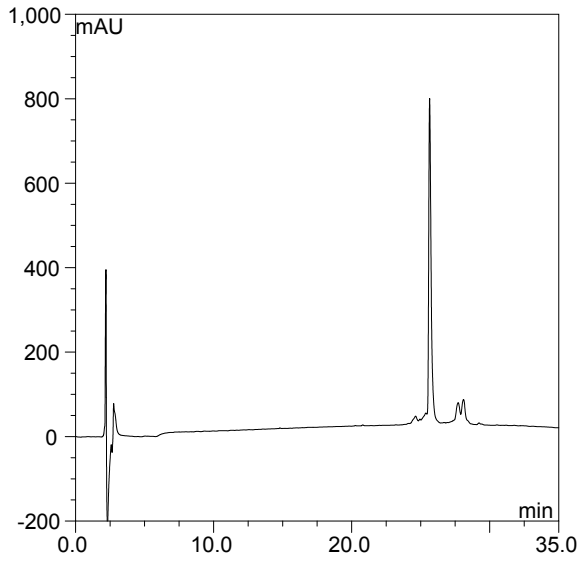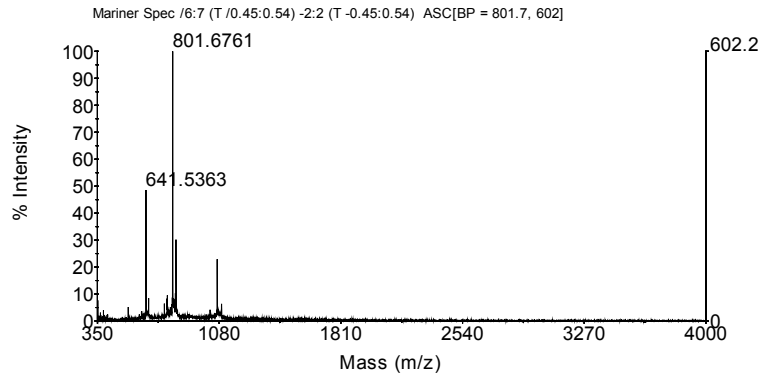

**(9) TPP-[Ala<sup>1</sup>]Lmagainin**

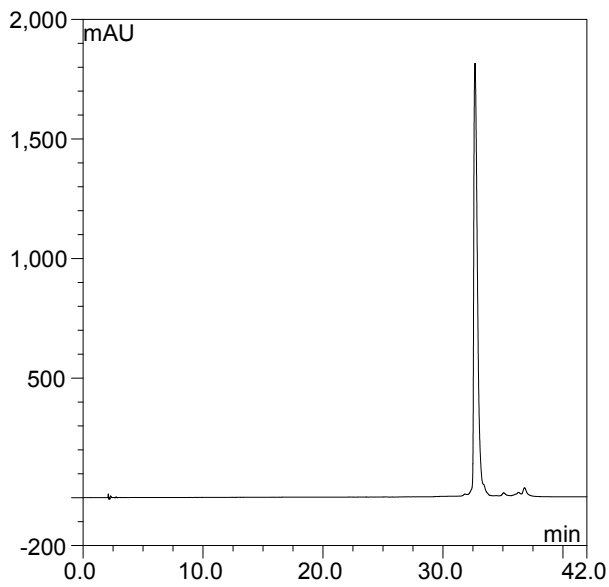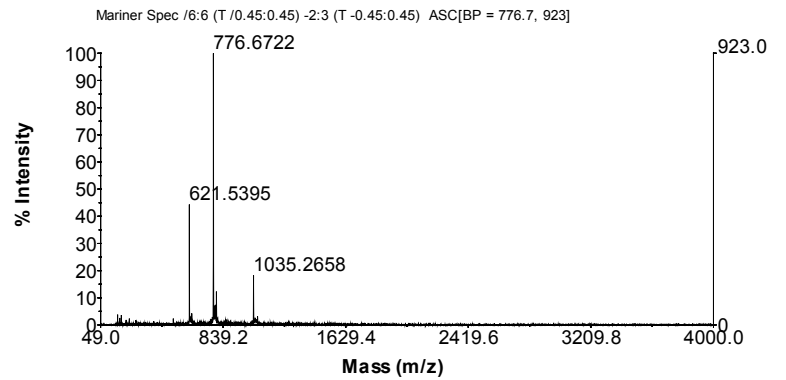

**(10) TPP-DAla-Lmagainin**

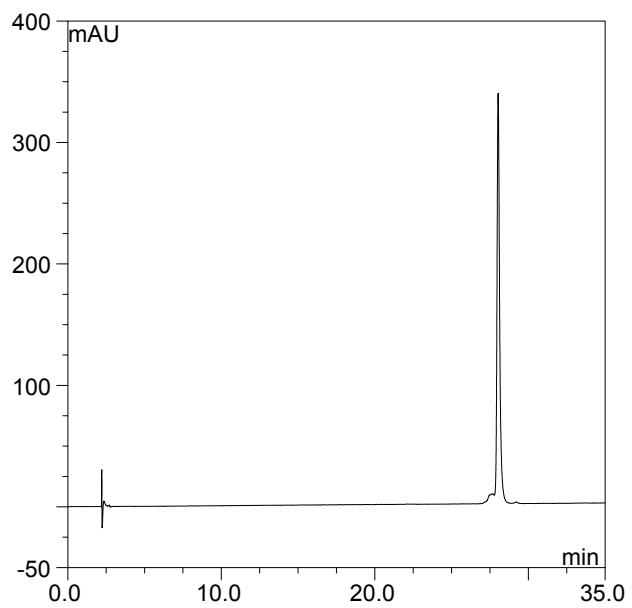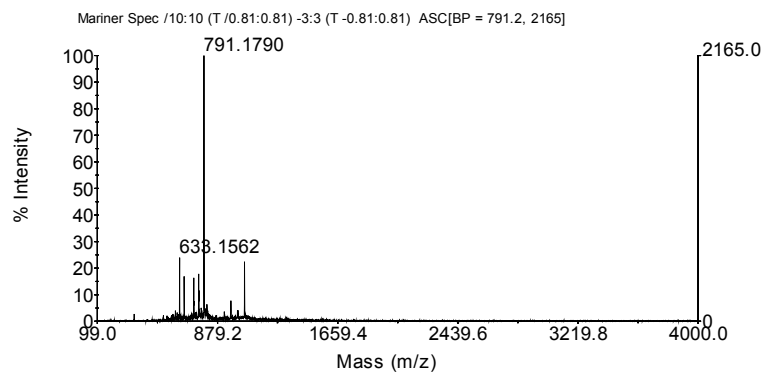

Supplement: c6ob01633b1.pdf [file c6ob01633b1.pdf]
